# Supplementary material
Source: Research Square preprint supplement (doi:10.21203/rs.3.rs-9390812/v1)
Supplement: Supplementary file 1 [file 85959d4cd3e0c20960ce57ca.docx]

Table S1: Composite welfare score sheet for the SDFT laceration in donkey model.

| Parameter | Animal ID | Score | Date/Time |
| --- | --- | --- | --- |
| Food and water intake | Normal | 0 |  |
|  | Moderate | 1 |  |
|  | Low | 2 |  |
|  | No food or water intake | 4 |  |
| Clinical parameters | Normal temperature (T), cardiac (C) and respiratory (R)rates | 0 |  |
|  | Slight changes | 1 |  |
|  | T ± 1°C, C/R rates increase more than 30% | 2 |  |
|  | T ± 2°C, C/R rates increase more than 50% | 4 |  |
| Natural behaviour | Normal | 0 |  |
|  | Minor Changes | 1 |  |
|  | Less mobile and alert | 2 |  |
|  | Restless or still | 4 |  |
| Provoked behaviour | Normal | 0 |  |
|  | Minor depression or exaggerated response | 1 |  |
|  | Moderate change in expected behaviour | 2 |  |
|  | Reacts violently, or very weak and pre comatose | 4 |  |
| Total | 0-16 |  |  |
| Score | Action | | |
| 0-3 | Normal, no action to be taken | | |
| 4-8 | Monitor carefully, consider analgesics | | |
| 9-12 | Seek second opinion from named animal care and welfare officer and/or named veterinary surgeon.  Consider euthanasia. | | |
| 13-16 | Indicates severe pain.  Seek immediate second opinion from named veterinary surgeon.  Animal withdrawn from project.  Based on advice from named veterinary surgeon, initiate appropriate treatment and analgesia.  If animal’s symptoms cannot be alleviated, again in consultation with the named veterinary surgeon, consider euthanasia. | | |

**Table S2.** Lameness score according to modified Utrecht University Scale for Donkeys Composite Pain Assessment**.**

| **Score** | | **Description** |
| --- | --- | --- |
| 0 | No lameness | No reluctance to move and normal gait |
| 1 | Mild | Mildly abnormal gait and /or stiff walk / Lameness is difficult to observe |
| 2 | Moderate | Reluctance to move when motivated and/or severely abnormal gait. Lameness is obvious at a walk and/or at trot |
| 3 | Severe | No movement or is lying down |

**Table S3.** Discomfort score at the 24-hour examination time**(22).**

| **Standing Posture score** | | |
| --- | --- | --- |
| 0 | Quietly standing and/or one hind leg resting. | |
| 1 | Slightly tucked up abdomen and/or mild weight shifting. | |
| 2 | Extremely tucked up abdomen and/or hunched back and/or stretching limbs/body and/or mild muscle tremors. | |
| 3 | Sits on hind quarters and/or extreme muscle tremors. | |
| **Resting posture (lying down -Excluding Auto Grooming)** | | |
| 0 | | Does not lie down or rests lying down. |
| 1 | | Attempts to lie down or is lying down <50% of the time. |
| 2 | | Lying down >50% of the time. |
| 3 | | Lies down in abnormal position: on its side with stretched limbs or on its back and/or is repeatedly rolling. |
| **Reaction to Palpation of the Painful Area** | | |
| 0 | | No reaction to palpation. |
| 2 | | Mild reaction to palpation. |
| 3 | | Severe reaction to palpation. |
| 0-9 | | Total discomfort score |

**Table S4.** Ultrasound scoring system for evaluating the superficial digital flexor tendon, the fiber echogenicity score and the fiber alignment score**(53).**

| **Score** | **FES** | **FAS** |
| --- | --- | --- |
| **0** | Normal to nearly normal echogenicity | Normal to near normal pattern |
| **1** | 25- 50% loss of normal echogenicity | Loss of 25 - 50% of normal pattern |
| **2** | 50% anechoic and 50% normal echogenic | Loss of 50 - 75% of normal pattern |
| **3** | Mostly to completely anechoic | Loss of 75 - 100% of normal pattern |
| FES: Fiber echogenicity score in transverse plane.  FAS: Fiber alignment score in sagittal plane | | |

**Table S5.** Ultrasound scoring system for evaluating tendon thickness, shape, position and presence of intratendinous edema.

| **Score** | **Thickness** | **Shape** | **Position** | **Intratendinous edema** |
| --- | --- | --- | --- | --- |
| **0** | Normal or nearly normal  (0.5 – 0.6 cm) | Normal bracket shape | Normal position dorsal to DDFT | No edema |
| **1** | Mild increase in thickness (0.7 cm) | Irregular shape | Displaced | Present |
| **2** | Moderate increase in thickness (0.8 cm) | - | - | - |
| **3** | Severely increase in thickness (0.9 – 1 cm) | - | - | - |
| Thickness and Intratendinous edema in sagittal plane.  Shape and Position in transverse plane. | | | | |

**Table S6.** Tendon histopathological evaluation using Movin’s scoring system.

| **Score** | **Tendon repair assessment score** | | | |
| --- | --- | --- | --- | --- |
| 0 | 1 | 2 | 3 |
| Fiber structure | Continuous, long fiber | Slightly fragmented fiber | Moderately  fragmented fiber | Severely fragmented fiber |
| Fiber arrangement | Compacted and parallel | Slightly loose and wavy | Moderately loose, wavy and cross to each other | No identifiable pattern |
| Inflammation | < 10% | 10–20% | 20–30% | > 30% |
| Angiogenesis | < 10% | 10–20% | 20–30% | > 30% |
| Cell density | Normal pattern | Slightly increase | Moderately increase | Severely increase |
| Rounding of the nuclei | Long spindle shaped | Slightly rounding | Moderately rounding | Severely rounding |
| Histopathological healing score | Grade 0: Normal | Grade I:  nearly normal | Grade II:  abnormal | Grade III:  severely abnormal |

| **Table S7.** Results of the clinical evaluation between the different groups at three different evaluation times. | | | | | |
| --- | --- | --- | --- | --- | --- |
| **Group** | **Evaluation times** | |  | **P1 value** | **Normal** |
| **45** | **90** |
| **Circumferences F/df= 2,10** | | | | |  |
| Control | 13.58±0.38**b**** | 14.50±0.45**a**** | 65.189 | <0.0001 | 12.00±0.00**b** |
| PRF | 12.58±0.28**a*** | 12.07±0.11**b*** | 19.316 | <0.001 | 12.0±0.00**b** |
| PRF/Ch | 12.67±0.41**a*** | 12.03±0.08**b*** | 15.875 | 0.001 | 12.00±0.00**b** |
| F test/ df=2,15 | 17.045 | 165.736 |  |  |  |
| P2 value | <0.0001 | <0.0001 |  |  | - |
| **Lameness Friedman Statistic/df= 1** | | | | |  |
| Control | 2.0(2.0-3.0)**a**** | 2.0(2.0-3.0)**a**** | 5.333 | 0.021 | 0.0(0.0-0.0)**b** |
| PRF | 0.0(0.0-0.0)***** | 0.0(0.0-0.0)***** | 0.000 | 1.000 | 0.0(0.0-0.0) |
| PRF/Ch | 0.0(0.00-0.00)***** | 0.0(0.0-0.0)***** | 0.000 | 1.000 | 0.0(0.0-0.0) |
| z- Test | 22.915 | 22.914 |  |  | - |
| P2 value | < 0.0001 | < 0.0001 |  |  | - |
| **Standing Posture Friedman Statistic/df= 1** | | | | |  |
| Control | 2.0(1.00-3.00)a****** | 2.5(2.00-3.00)a****** | 5.333 | 0.021 | 0.0(0.0-0.0)b |
| PRF | 0.5(0.00-1.00)a***** | 0.0(0.0-0.0)b***** | 18.00 | <0.0001 | 0.0(0.0-0.0)b |
| PRF/Ch | 0.5(0.00-1.00)a***** | 0.0(0.0-0.0)b***** | 18.00 | <0.0001 | 0.0(0.0-0.0)b |
| z- Test | 10.60 | 16.32 |  |  | - |
| P2 value | 0.005 | 0.000 |  |  | - |
| **Resting posture Friedman Statistic/df= 1** | | | | |  |
| Control | 2.0(2.0-3.0)a******* | 2.0(1.0-3.0)a****** | 5.333 | 0.021 | 0.0(0.0-0.0)b |
| PRF | 1.0(0.0-1.0)a***** | 0.0(0.0-0.0)b***** | 6 | 0.014 | 0.0(0.0-0.0)b |
| PRF/Ch | 1.0(1.0-2.00)a****** | 0.0(0.0-0.0)b***** | 6 | 0.014 | 0.0(0.0-0.0)b |
| z- Test | 20.08 | 22.9 |  |  | - |
| P2 value | 0.003 | 0.001 |  |  | - |
| **Palpation Friedman Statistic/df= 1** | | | | |  |
| Control | 2.0(2.0-3.00)a****** | 3.0(2.0-3.0)a****** | 3.6 | 0.058 | 0.0(0.0-0.0)b |
| PRF | 0.0(0.0-2.00)a***** | 0.0(0.0-0.0)a***** | 16.00 | < 0.0001 | 0.0(0.0-0.0)a |
| PRF/Ch | 0.0(0.0-2.00)a***** | 0.0(0.0-0.0)a***** | 16.00 | < 0.0001 | 0.0(0.0-0.0)a |
| z- Test | 11.824 | 22.915 |  |  | - |
| P2 value | 0.019 | < 0.0001 |  |  | - |
| **Total Discomfort score Friedman Statistic/df= 1** | | | | |  |
| Control | 6.5(6.0-8.00)a****** | 7.5(6.0-8.0)a****** | 5.333 | 0.021 | 0.0(0.0-0.0)b |
| PRF | 2.0(1.0-3.0)a***** | 0.0(0.0-0.0)b***** | 9.000 | 0.003 | 0.0(0.0-0.0)b |
| PRF/Ch | 2.0(1.0-3.0)a***** | 0.0(0.0-0.0)b***** | 8.067 | 0.005 | 0.0(0.0-0.0)b |
| z- Test | 23.456 | 22.91 |  |  | - |
| P2 value | 0.009 | 0.001 |  |  | - |
| a,b,c small letters superscripts, in the same raw are significantly different at P<0.05  *,**,*** asterisks in the same column are significantly different at P<0.05  P1 value= the significance of time effect within the group, P2 value=the significance of treatment effect within the time. | | | | | |

**Table S8.** Results of FES, FAS, and thickness scores of all groups at three different evaluation times.

| **Group** | **Evaluation times** | | | | | | | |  | | **Friedman Statistic/df= 1** | **P1 value** |
| --- | --- | --- | --- | --- | --- | --- | --- | --- | --- | --- | --- | --- |
| **T0** | | **T2** | **T4** | **T6** | **T8** | **T10** | **T12** | **Normal** | |
|  | | **FES** | | | | | | | | | | |
| Control | 3(3-3)a | | 3(2-3)a | 3(2-3)a* | 2(1-2)b** | 2(1-2)b** | 2(1-2)b** | 1(1-2)b** | 0.0(0.0-0.0)c | 11.333 | | 0.003 |
| PRF | 3(3-3)a | | 3(2-3)a | 1(1-2)b* | 0(0-1)c* | 0(0-1)c* | 0(0-0)c* | 0(0-0)c* | 0.0(0.0-0.0)c | 12.958 | | 0.002 |
| PRF/Ch | 3(3-3)a | | 3(2-3)a | 1(1-2)b* | 0(0-1)c* | 0(0-1)c* | 0(0-0)c* | 0(0-0)c* | 0.0(0.0-0.0)**c** | 13.690 | | 0.001 |
| z- Test | 0.00 | | 0.523 | 12.342 | 10.362 | 11.472 | 16.393 | 16.615 |  | |  |  |
| P2 value | 1.00 | | 0.770 | 0.002 | 0.006 | 0.003 | 0.00 | 0.00 |  | |  |  |
|  | | **FAS** | | | | | | | | | | |
| Control | 3(3-3)a | | 3(3-3)a | 3(3-3)a | 3(3-3)a** | 3(2-3)a** | 3(2-3)a** | 2(1-2)b** | 0.0(0.0-0.0)c | | 0.000 | 1.000 |
| PRF | 3(3-3)a | | 3(3-3)a | 3(3-3)a | 2(1-2)b * | 2(1-2)b* | 1(0-1)c* | 0(0-1)d* | 0.0(0.0-0.0)d | | 4.250 | 0.119 |
| PRF/Ch | 3(3-3)a | | 3(3-3)a | 3(3-3)a | 2(1-2)b* | 2(1-2)b* | 1(0-1)c* | 0(0-1)d* | 0.0(0.0-0.0) d | | 4.250 | 0.119 |
| z- Test | 0.00 | | 0.00 | 0.00 | 2.429 | 8.620 | 13.909 | 12.499 |  | |  |  |
| P2 value | 1.00 | | 1.00 | 0.368 | 0.297 | 0.013 | 0.001 | 0.002 |  | |  |  |
|  | | **Thickness score** | | | | | | | | | | |
| Control | 2(2-3)b** | | 2(2-3)b** | 3(3-3)a | 3(2-3)a** | 3(2-3)a** | 3(2-3)a*** | 3(2-3)a*** | 0.0(0.0-0.0)c | | 8.587 | 0.014 |
| PRF | 0.5(0-1)d* | | 2(1-3)b** | 3(3-3)a | 1(1-2)c* | 1(1-2)c* | 1(1-2)c** | 1(1-2)c** | 0.0(0.0-0.0)d | | 12.535 | 0.002 |
| PRF/Ch | 0(0-0)d* | | 0(0-1)d* | 3(2-3)a | 1(1-2)b* | 1(0-1)c * | 0(0-1)d* | 0(0-1)d* | 0.0(0.0-0.0) d | | 14.915 | 0.001 |
| z- Test | 13.504 | | 12.108 | 2.00 | 10.362 | 14.069 | 14.217 | 14.915 |  | |  |  |
| P2 value | 0.01 | | 0.002 | 1.00 | 0.006 | 0.001 | 0.001 | 0.001 |  | |  |  |
| FES: Fiber echogenicity score, FAS: Fiber alignment score  T0: two days PO, T2: 2nd PO week, T4: 4th PO week, T6: 6th PO week, T8: 8th PO week, T10:10th PO week, T12:12th PO week.  a, b, c small letters superscripts, in the same raw are significantly different at P < 0.05  *, **, *** asterisks in the same column are significantly different at P < 0.05  P1 value= the significance of time effect within the group, P2 value=the significance of treatment effect within the time. | | | | | | | | | | | | |

**Table S9.** Results of ultrasonographic assessment (tendon position, shape and presence of intratendinous edema).

| **Group** | | **Evaluation times** | | | | | | | **friedman Statistic** | | **P1 value** |
| --- | --- | --- | --- | --- | --- | --- | --- | --- | --- | --- | --- |
| **T0** | **T2** | **T4** | **T6** | **T8** | **T10** | **T12** |  | |
|  | **Position** | | | | | | | | | | |
| Control | | - | - | - | 1 | 1 | 1 | 1 | - | - | |
| PRF | | - | - | - | 1 | 1 | 1 | 1 | - | - | |
| PRF/Ch | | - | - | - | 1 | 1 | 1 | 1 | - | - | |
| Fisher exact test | |  |  |  | - | - | - | - |  |  | |
| P2 value | | - |  |  | - | - | - | - |  |  | |
|  | **Shape** | | | | | | | | | | |
| Control | | - | - | - | 1 | 1* | 1* | 1* | - | - | |
| PRF | | - | - | - | 1a | 0b** | 0b** | 0b** | 19.139 | 0.000 | |
| PRF/Ch | | - | - | - | 1a | 0b** | 0b** | 0b** | 19.139 | 0.000 | |
| Fisher exact test | |  |  |  | - | 16.505 | 16.505 | 16.505 |  |  | |
| P2 value | | - |  |  | - | 0.000 | 0.000 | 0.000 |  |  | |
|  | **Intratendinous edema** | | | | | | | | | | |
| Control | | 1 | 1 | 1 | 1* | 1* | 1* | 1* | - | - | |
| PRF | | 1 | 1 | 1 | 0a** | 0b** | 0b** | 0b** | 41.793 | 0.000 | |
| PRF/Ch | | 1 | 1 | 1 | 0a** | 0b** | 0b** | 0b** | 41.793 | 0.000 | |
| Fisher exact test | | - | - | - | - | 16.505 | 16.505 | 16.505 |  |  | |
| P2 value | | - | - | - | - | 0.000 | 0.000 | 0.000 |  |  | |
| T0: two days PO, T2: 2nd PO week, T4: 4th PO week, T6: 6th PO week, T8: 8th PO week, T10:10th PO week, T12:12th PO week.  a, b, c small letters superscripts, in the same raw are significantly different at P < 0.05  *, **, *** asterisks in the same column are significantly different at P < 0.05  P1 value= the significance of time effect within the group, P2 value=the significance of treatment effect within the time. | | | | | | | | | | | |

| **Table S10.** Shows results of histopathological assessment scores between the different groups at two different evaluation times. | | | | | |  |
| --- | --- | --- | --- | --- | --- | --- |
| **Group** | **Evaluation times** | | | **Friedman Statistic/df= 1** | **P1 value** | **Normal** |
|  | **45th day** | **90th day** |
| **fiber structure** | | | | | |  |
| Control |  | 3 (2-3)**a**** | 2 (2-3)**b**** | 3.267 | 0.071 | 0.0 (0.0-0.0)**c** |
| PRF |  | 1.8 (1-2)**a*** | 0.5 (0-1)**b*** | 15.000 | <0.0001 | 0.0 (0.0-0.0)**c** |
| PRF/Ch |  | 1.8 (1-2) **a*** | 0 (0-0) **b*** | 15.000 | <0.0001 | 0.0 (0.0-0.0)**b** |
| z- Test |  | 13.917 | 28.093 |  |  |  |
| P2 value |  | 0.084 | < 0.0001 |  |  | - |
| **Fiber arrangement** | | | | | |  |
| Control |  | 3 (2-3)**a**** | 2 (2-3)**a**** | 0.692 | 0.403 | 0.0 (0.0-0.0)**b** |
| PRF |  | 1.8 (1-2) **a*** | 1 (0-1) **b*** | 15.000 | <0.0001 | 0.0 (0.0-0.0)c |
| PRF/Ch |  | 1 (1-2) **a*** | 0 (0-1) **b*** | 16.000 | <0.0001 | 0.0 (0.0-0.0) **b** |
| z- Test |  | 19.775 | 26.171 |  |  | - |
| P2 value |  | 0.003 | < 0.0001 |  |  | - |
| **Rounding of nuclei** | | | | | |  |
| Control |  | 3 (2-3)**a**** | 2 (2-3)**a**** | 1.333 | 0.248 | 0.0(0.0-0.0)b |
| PRF |  | 1 (1-2) a***** | 0.25(0-1) b***** | 17.000 | <0.0001 | 0.0(0.0-0.0) b |
| PRF/Ch |  | 1 (1-2) a***** | 0 (0-1) b***** | 15.000 | <0.0001 | 0.0(0.0-0.0) b |
| z- Test |  | 16.83 | 24.44 |  |  | - |
| P value |  | 0.002 | 0.002 |  |  | - |
| **Inflammatory cells infiltration** | | | | | |  |
| Control |  | 3 **a**** | 2 (1-2)**b***** | 2.00 | 0.157 | 0.0(0.0-0.0) c |
| PRF |  | 1 (1-2) a***** | 1 (0-1) b****** | 16.000 | <0.0001 | 0.0(0.0-0.0) c |
| PRF/Ch |  | 1 (1-2) a***** | 0 (0-1) b***** | 16.000 | <0.0001 | 0.0(0.0-0.0) b |
| z- Test |  | 22.91 | 22.99 |  |  | - |
| P2 value |  | <0.0001 | <0.0001 |  |  | - |
| **Angiogenesis** | | | | | |  |
| Control |  | 3 **a**** | 2 (1-2)**b***** | 2.00 | 0.157 | 0.0(0.0-0.0) c |
| PRF |  | 2 (1-2) a***** | 1 (0-1) b****** | 13.000 | <0.0001 | 0.0(0.0-0.0) c |
| PRF/Ch |  | 1 (1-2) **a*** | 0.0(0.0-0.0) **b*** | 16.000 | <0.0001 | 0.0(0.0-0.0)b |
| z- Test |  | 26.17 | 22.99 |  |  | - |
| P2 value |  | <0.0001 | <0.0001 |  |  | - |
| **Cell density** | | | | | |  |
| Control |  | 3 (2-3)**a**** | 2 (2-3)**b**** | 2.250 | 0.13 | 0.0(0.0-0.0) c |
| PRF |  | 2 (2-3) a****** | 0.5 (0-1) b***** | 9.308 | 0.002 | 0.0(0.0-0.0) c |
| PRF/Ch |  | 1.25 (1-2) a***** | 0 (0-1) b***** | 16.000 | <0.0001 | 0.0(0.0-0.0) b |
| z- Test |  | 20.142 | 24.46 |  |  | - |
| P2 value |  | 0.01 | <0.0001 |  |  | - |
| **Total histopathological score** | | | | | |  |
| Control |  | 2.69 ± 0.43 a******* | 2.1 ± 0.52 b******* | 113.52 | 0.000 | 0.0(0.0-0.0) c |
| PRF |  | 1.56 ± 0.52 **a**** | 0.53 ± 0.50 b****** | 105.45 | 0.000 | 0.0(0.0-0.0) c |
| PRF/Ch |  | 1.36 ± 0.47 a***** | 0.14 ± 0.35 b***** | 118.17 | 0.000 | 0.0(0.0-0.0)c |
| z- Test |  | 84.22 | 108.48 |  |  | - |
| P2 value |  | 0.000 | 0.000 | - | -- | - |
| a,b,c small letters superscripts, in the same raw are significantly different at P<0.05  *,**,*** asterisks in the same column are significantly different at P<0.05  P1 value= the significance of time effect within the group, P2 value=the significance of treatment effect within the time. | | | | | | |
